# Supplementary material for: NEDD4L mediates intestinal epithelial cell ferroptosis to restrict inflammatory bowel diseases and colorectal tumorigenesis
Source: JCI journal article supplement (doi:10.1172/jci173994), 2024-12-17

**Figure 1H**

**H**

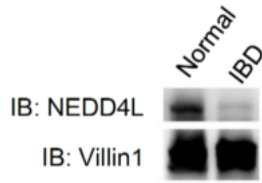

**Full unedited gel for Figure 1H**

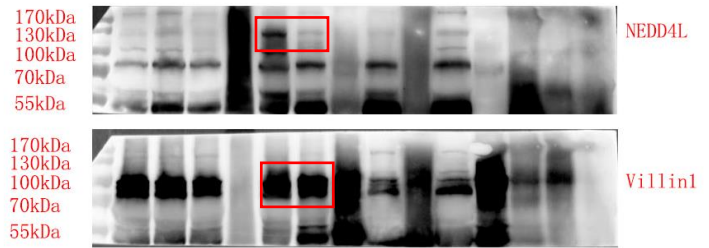

**Figure 1I**

**Full unedited gel for Figure 1I**

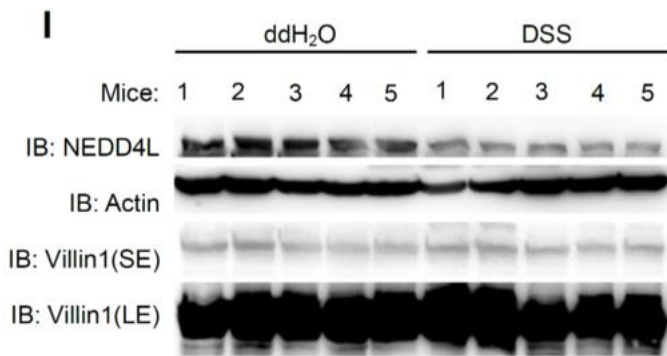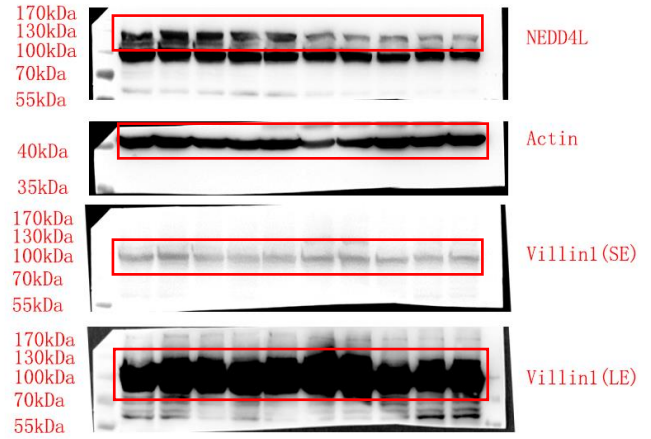

**Figure 5D**

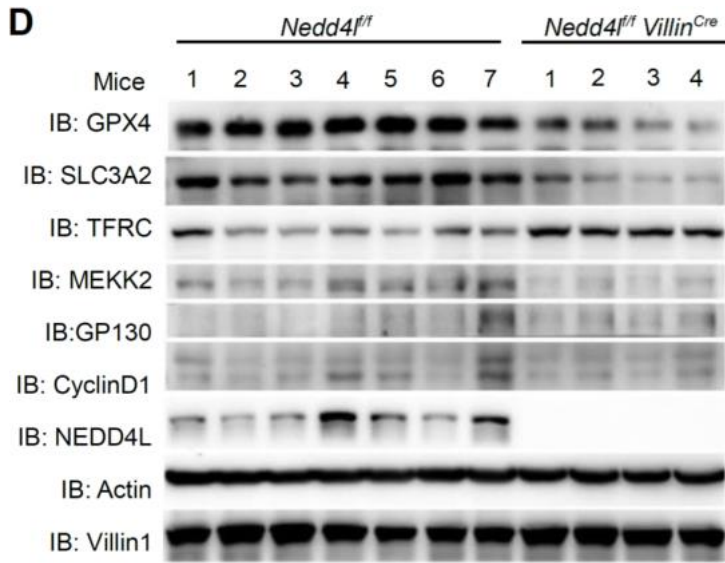

**Full unedited gel for Figure 5D**

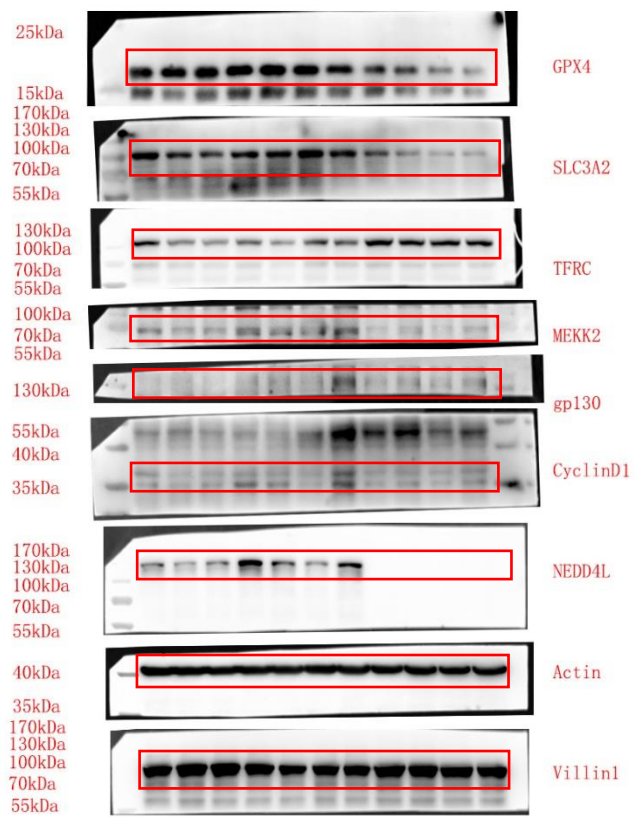

**Figure 5H**

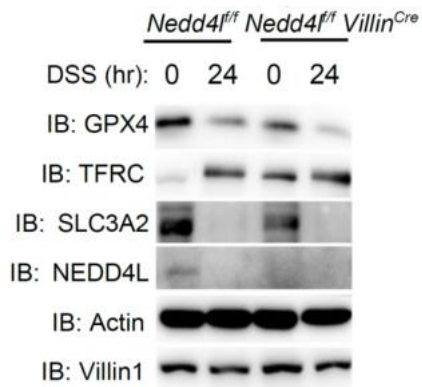

**Full unedited gel for Figure 5H**

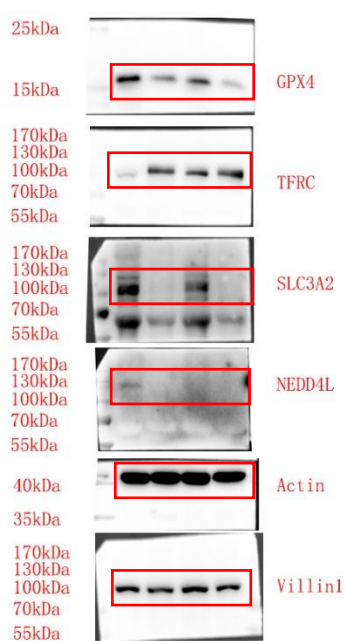

**Figure 5I**

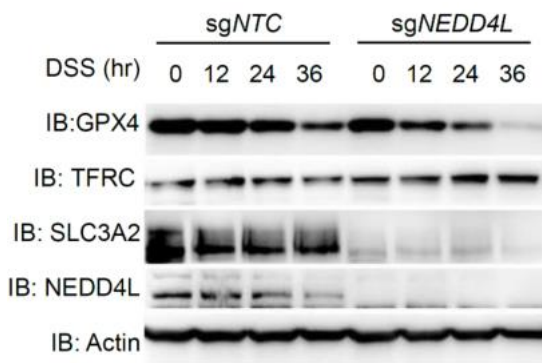

**Full unedited gel for Figure 5I**

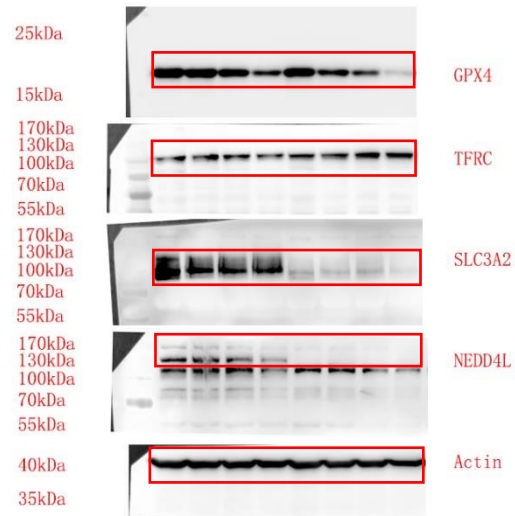

**Figure 5J**

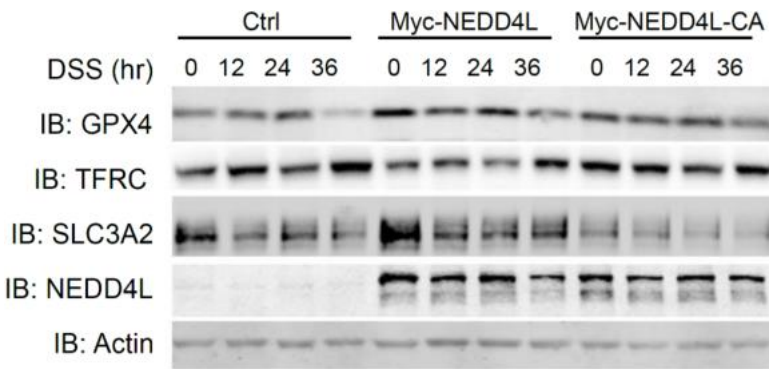

**Full unedited gel for Figure 5J**

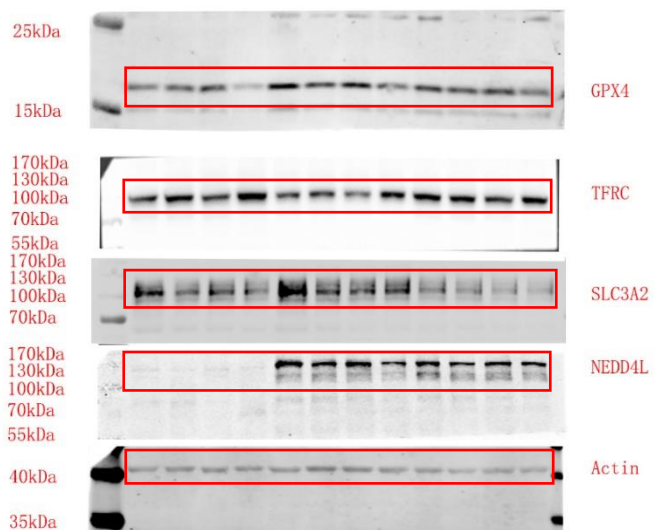

**Figure 5K**

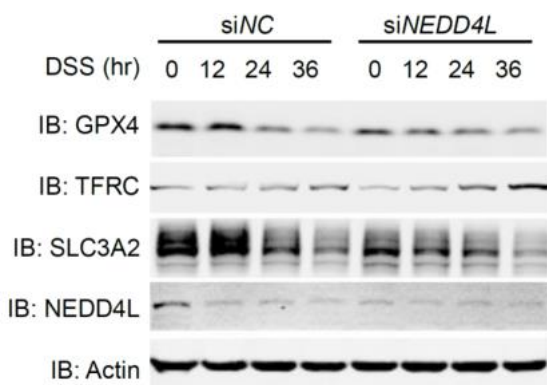

**Full unedited gel for Figure 5K**

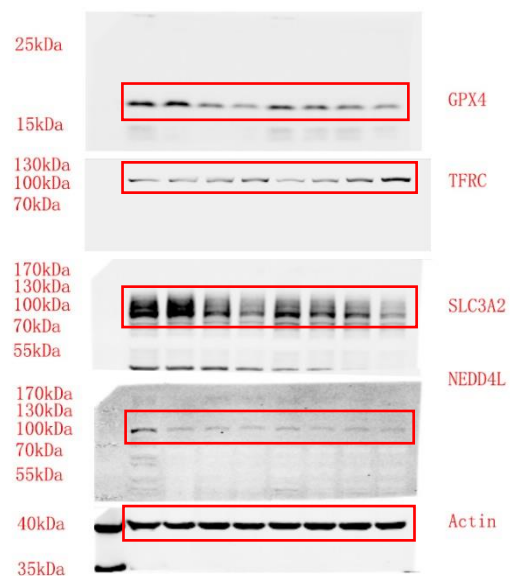

**Figure 5L**

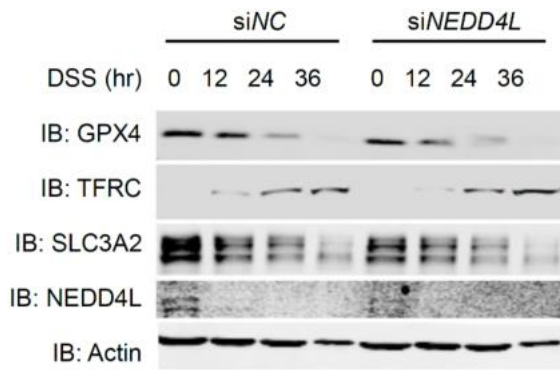

**Full unedited gel for Figure 5L**

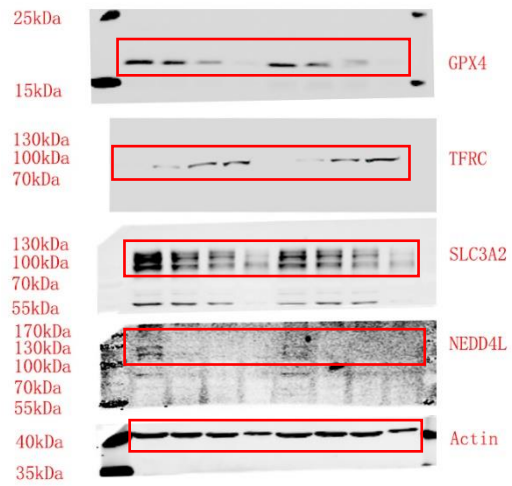

**Figure 5M**

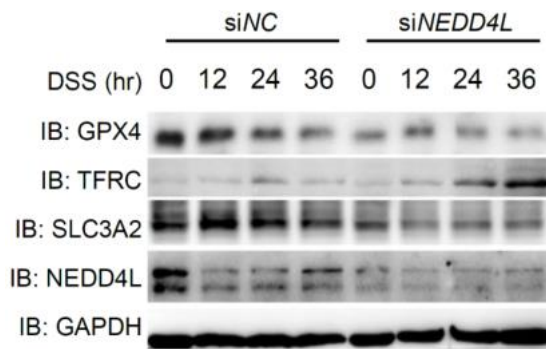

**Full unedited gel for Figure 5M**

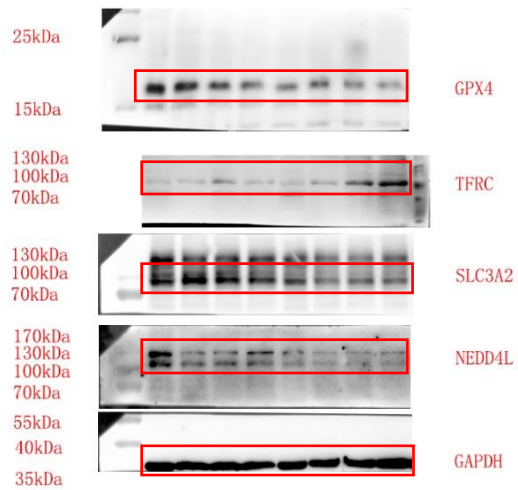

**Figure 6G**

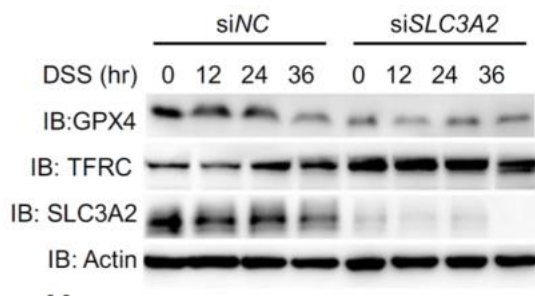

**Full unedited gel for Figure 6G**

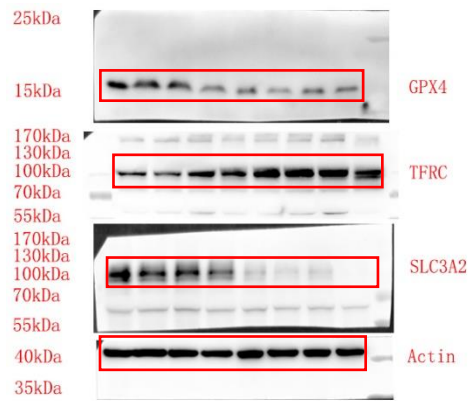

**Figure 6H**

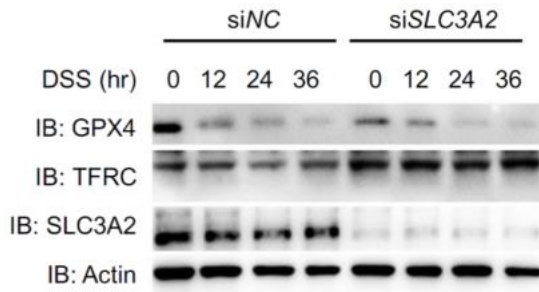

**Full unedited gel for Figure 6H**

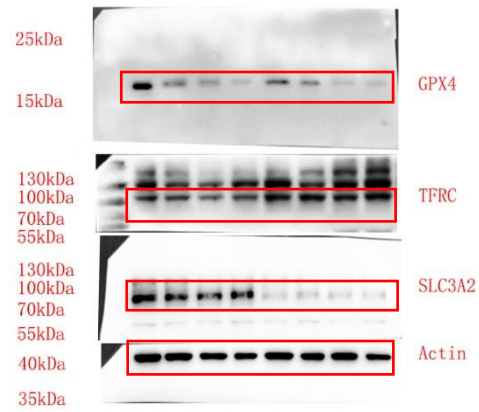

**Figure 6I**

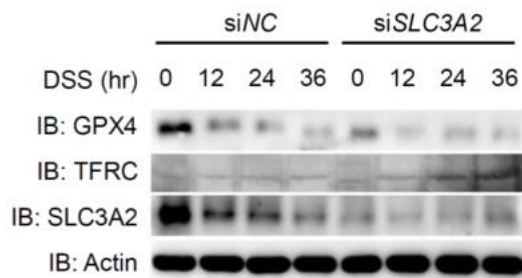

**Full unedited gel for Figure 6I**

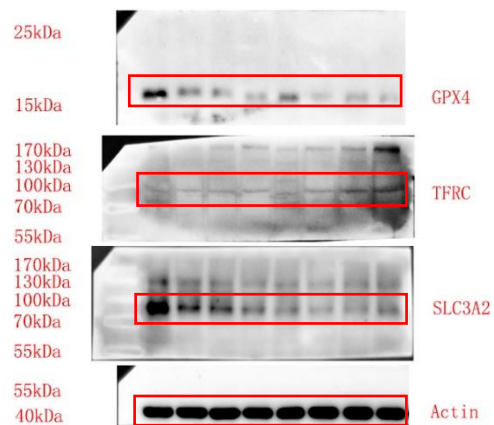

**Figure 6M**

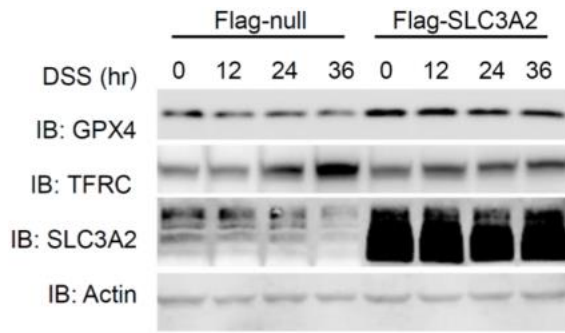

**Full unedited gel for Figure 6M**

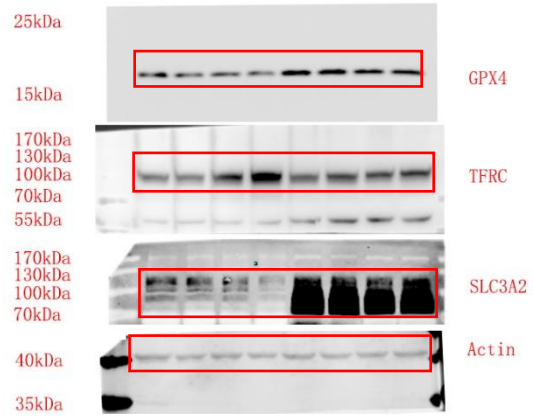

**Figure 6P**

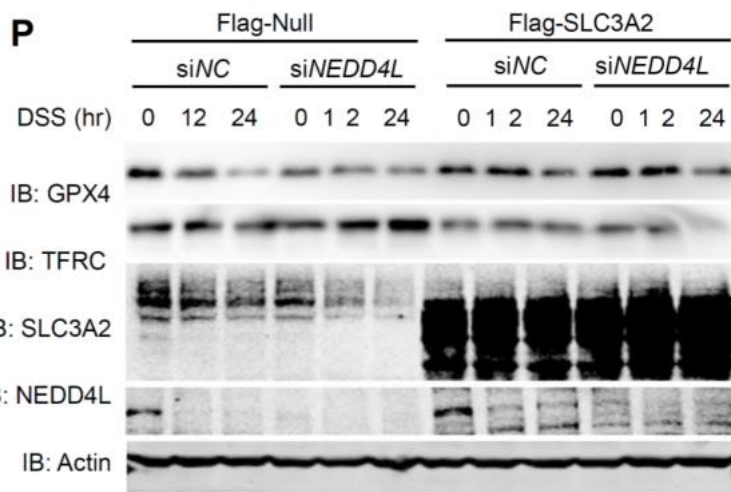

**Full unedited gel for Figure 6P**

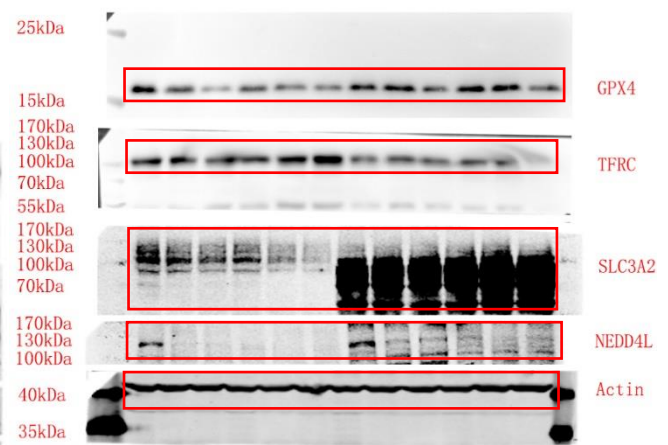

**Figure 7A**

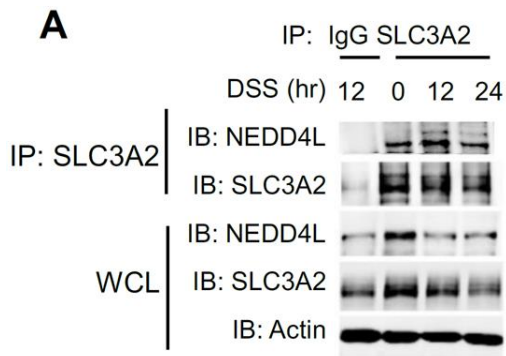

**Full unedited gel for Figure 7A**

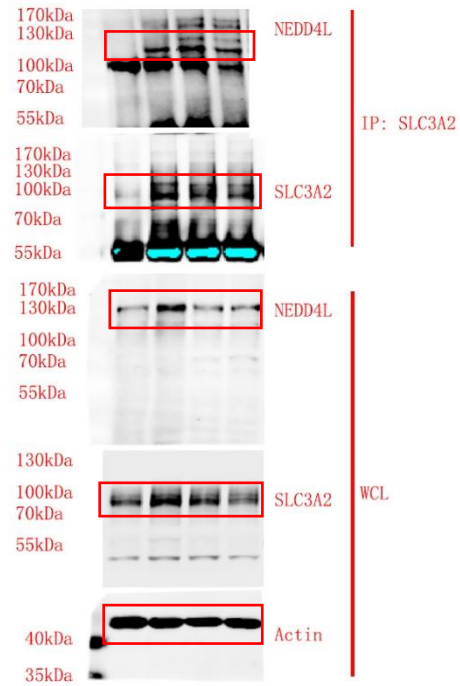

**Figure 7B**

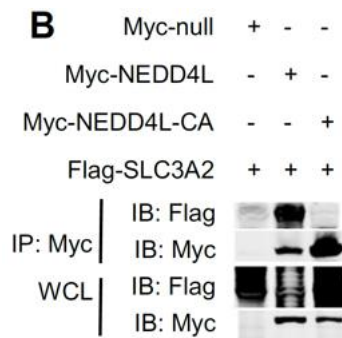

**Full unedited gel for Figure 7B**

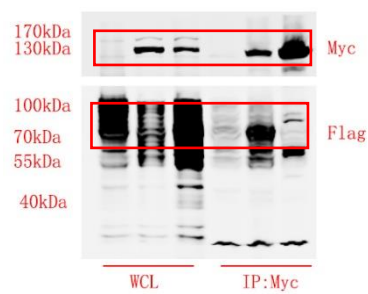

**Figure 7C**

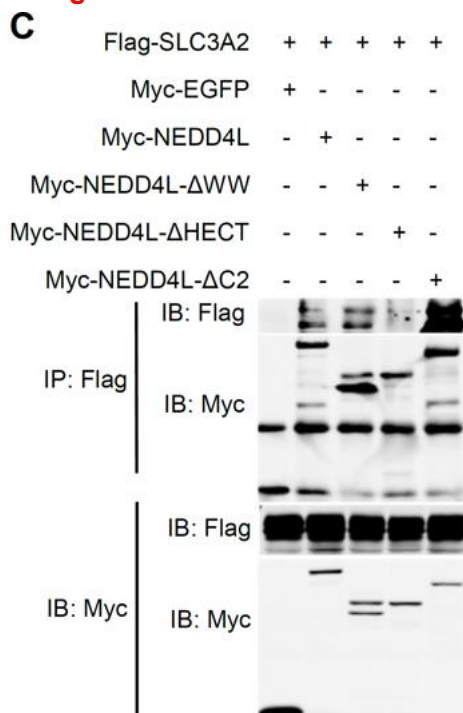

**Full unedited gel for Figure 7C**

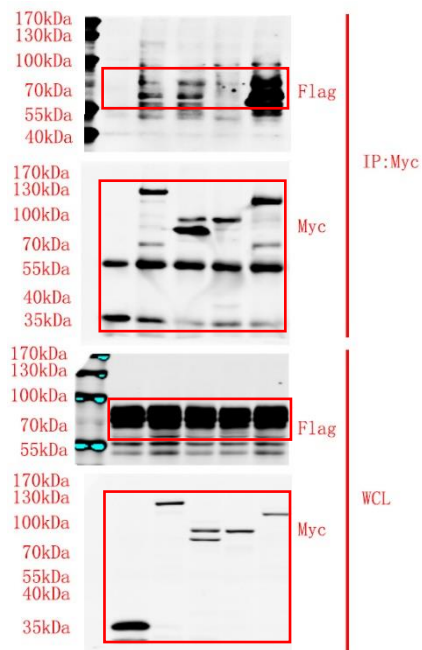

**Figure 7D**

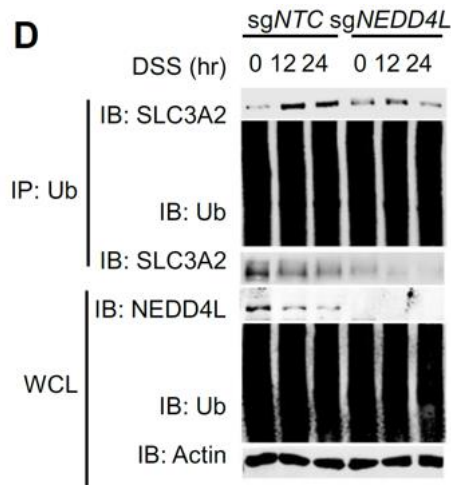

**Full unedited gel for Figure 7D**

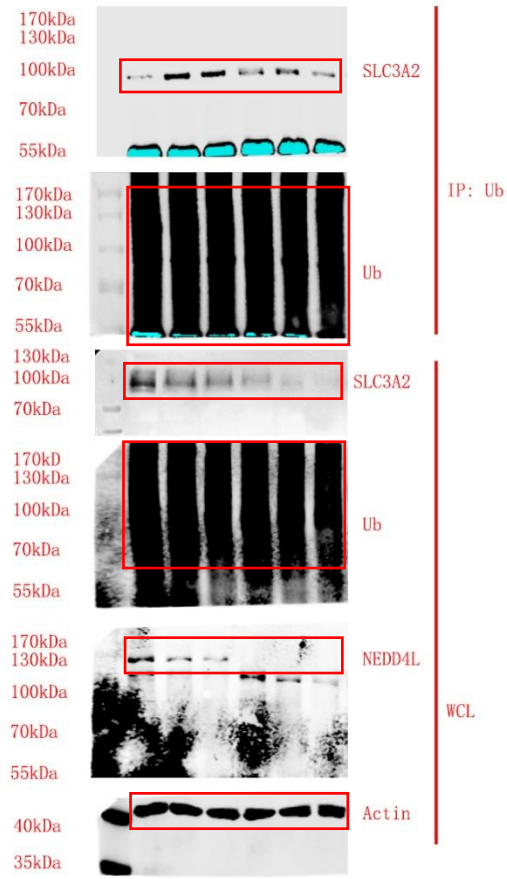

**Figure 7E**

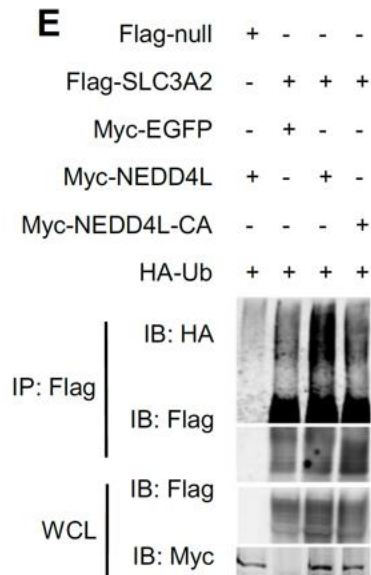

**Full unedited gel for Figure 7E**

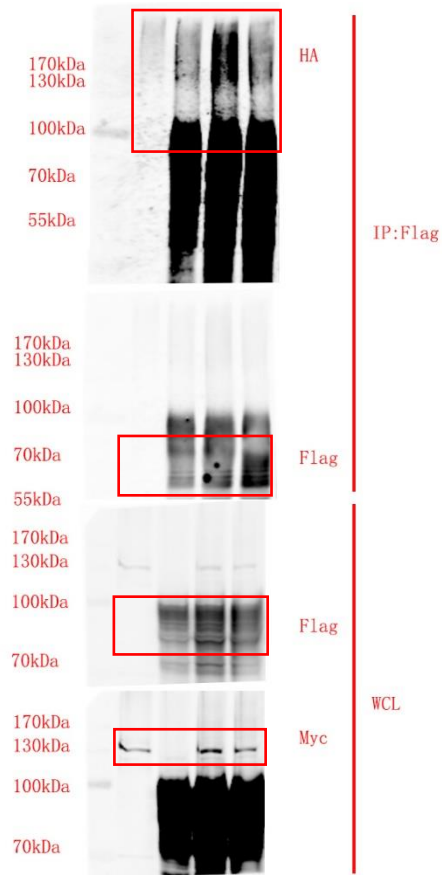



**Figure 7F**

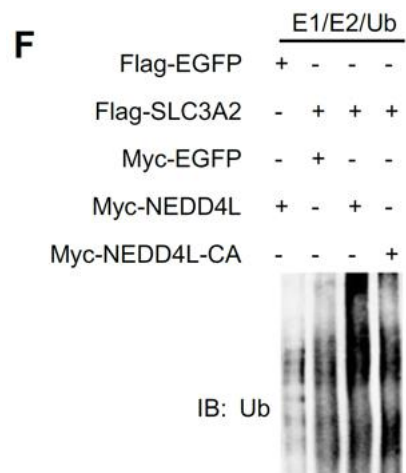

**Full unedited gel for Figure 7F**

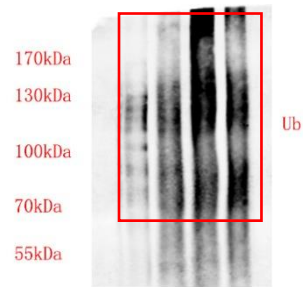

**Figure 7G**

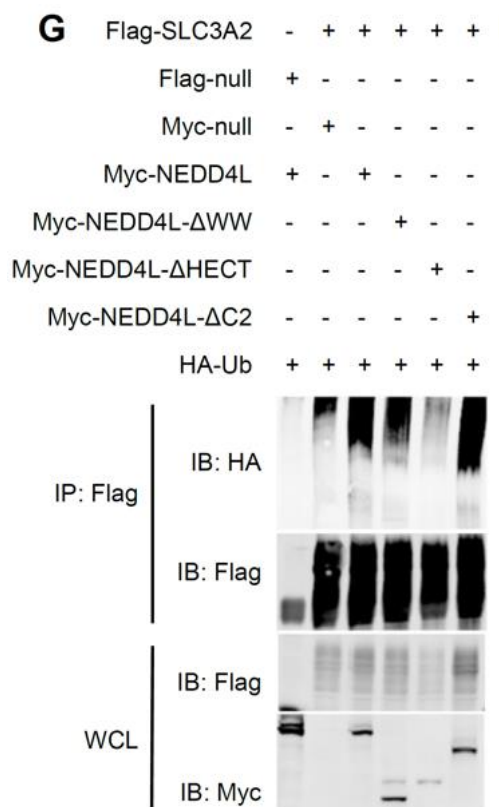

**Full unedited gel for Figure 7G**

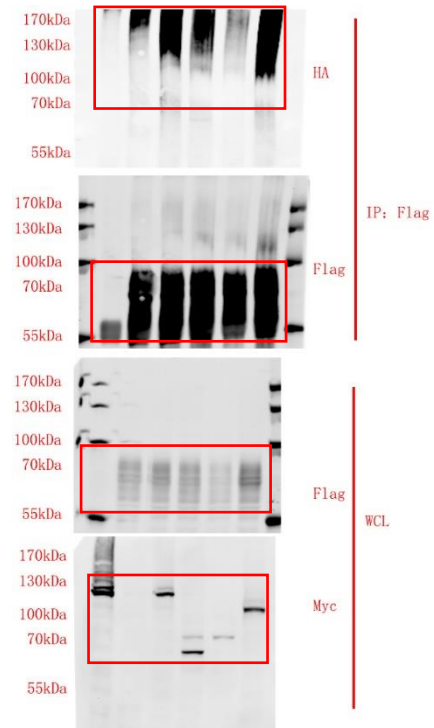

**Figure 7H**

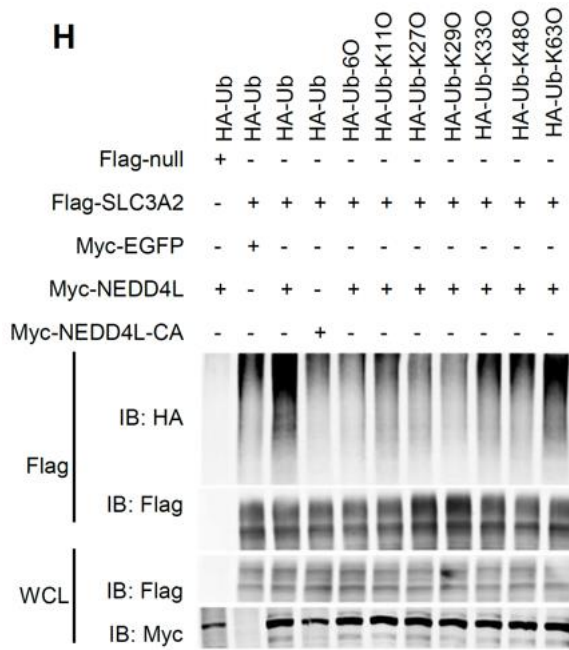

**Full unedited gel for Figure 7H**

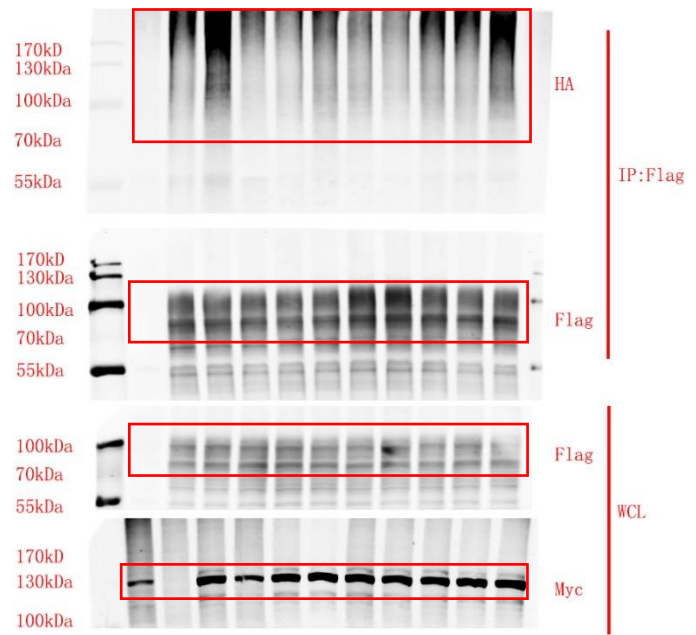

**Figure 7I**

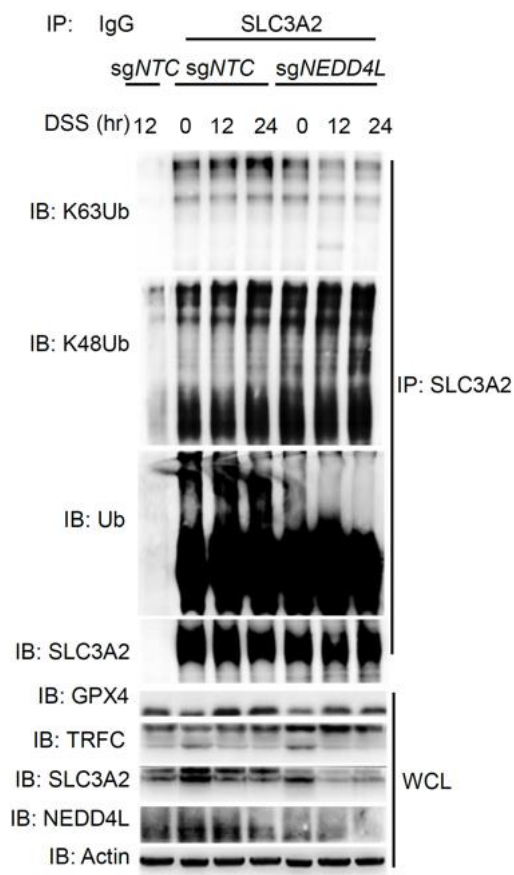

**Full unedited gel for Figure 7I**

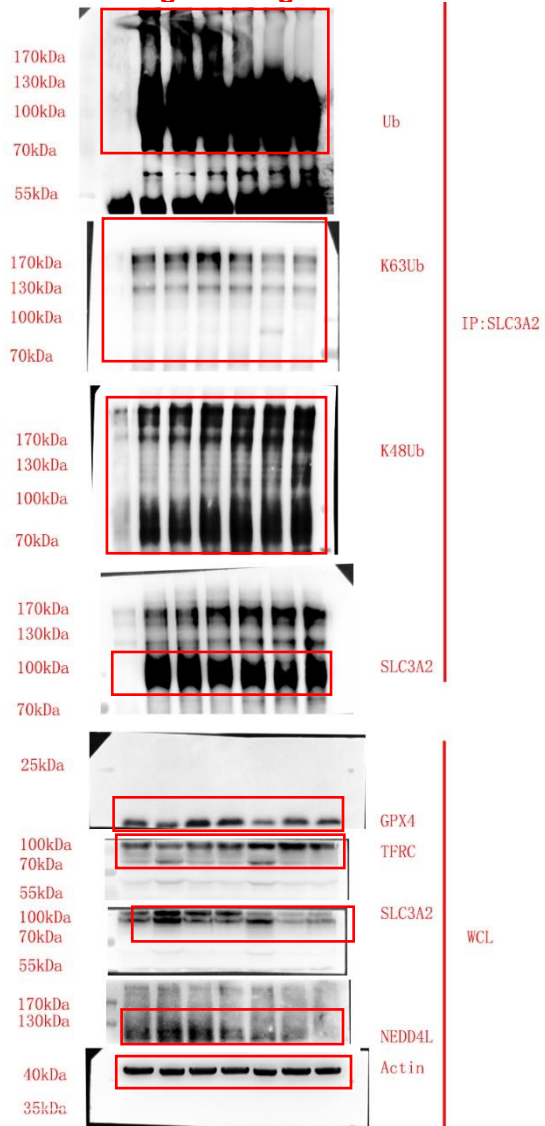

**Figure 7J**

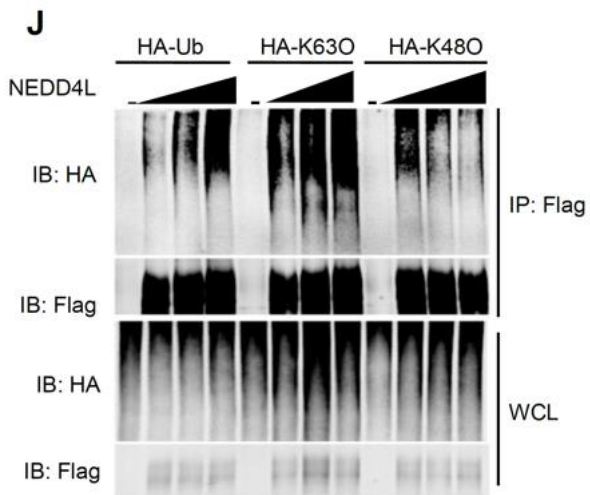

**Full unedited gel for Figure 7J**

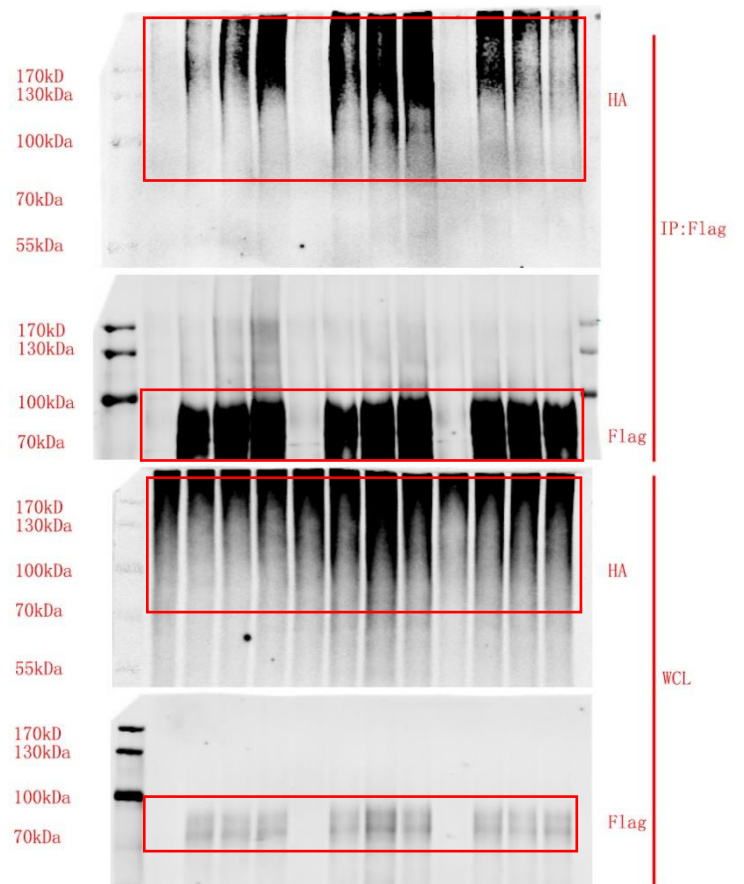

**Figure 8L**

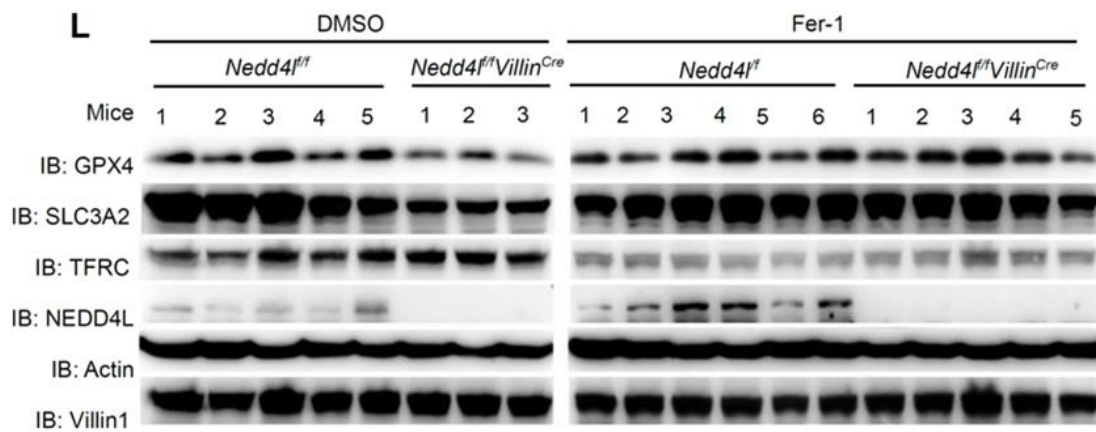

**Full unedited gel for Figure 8L**

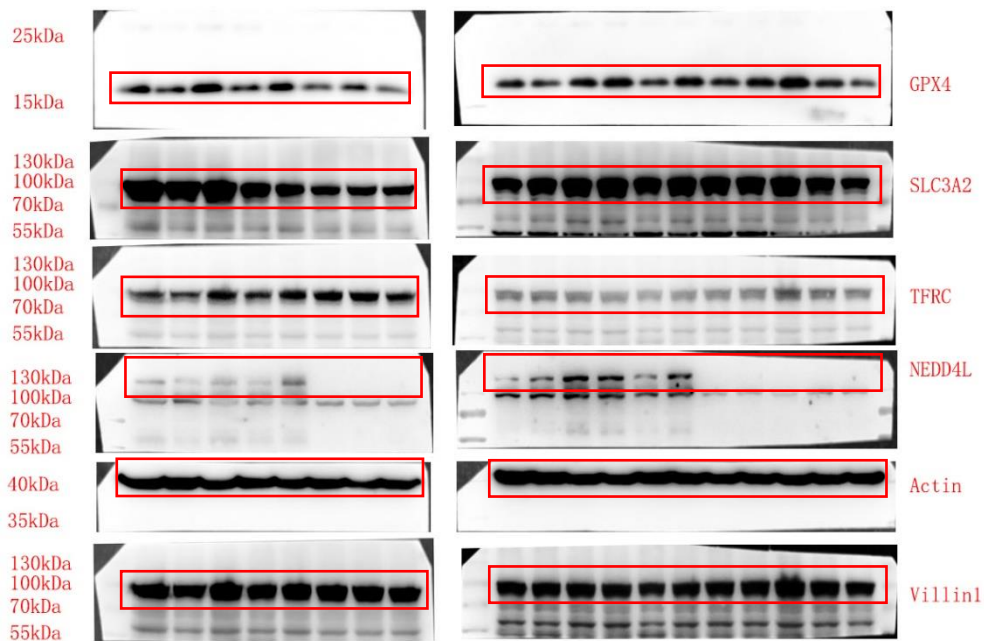

**Figure 10A**

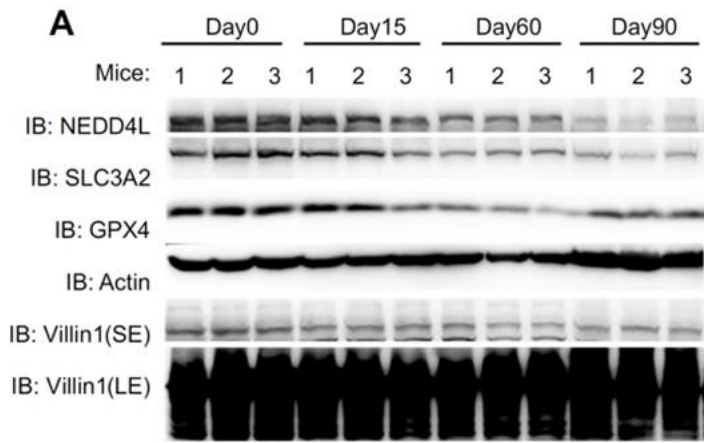

**Full unedited gel for Figure 10A**

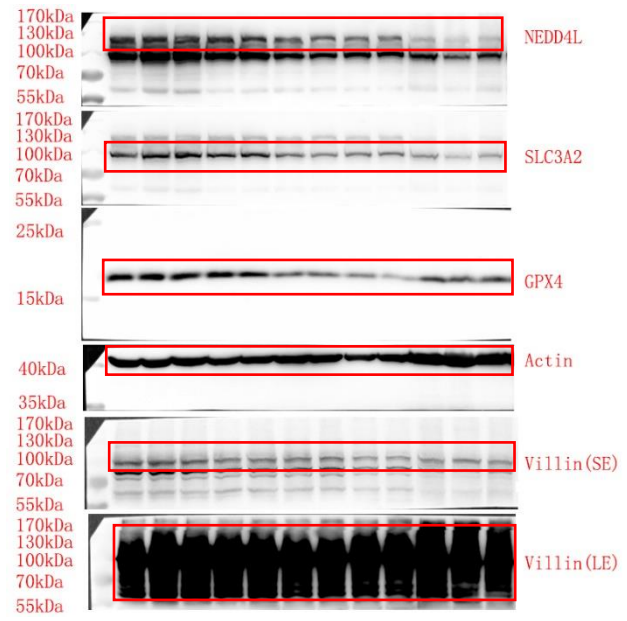

**Supplemental Figure 4E**

**Full unedited gel for Supplemental Figure 4E**

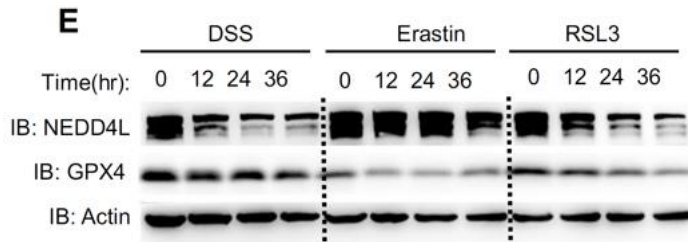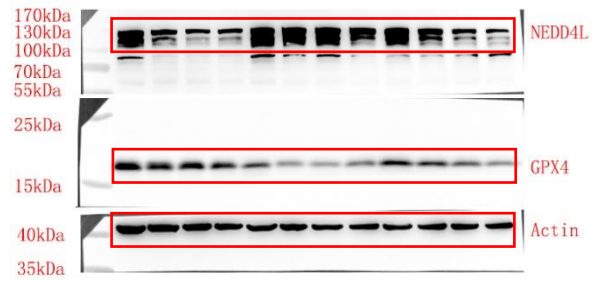

**Supplemental Figure 4G**

**Full unedited gel for Supplemental Figure 4G**

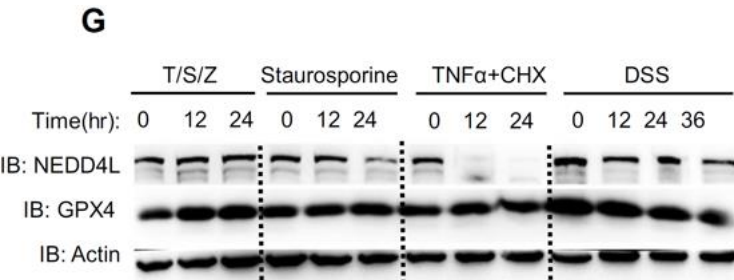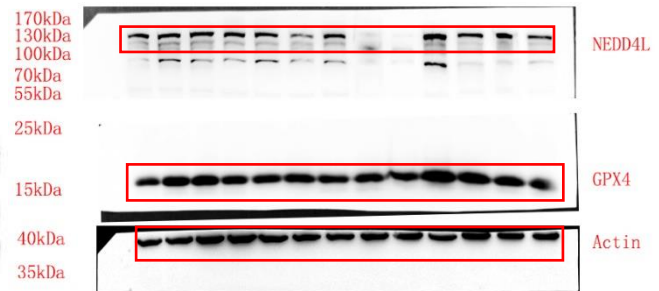

**Supplemental Figure 4I**

**Full unedited gel for Supplemental Figure 4I**

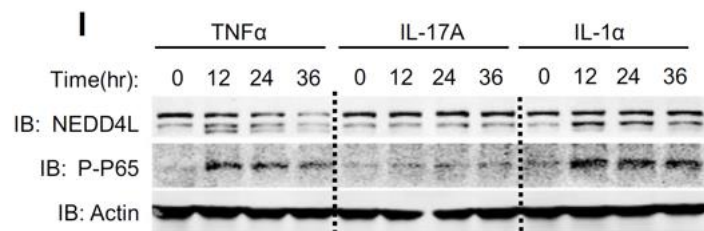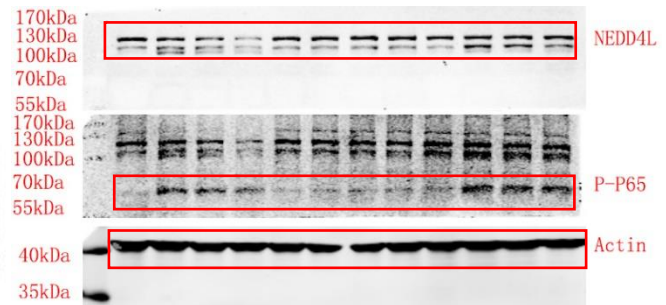

**Supplemental Figure 6D**

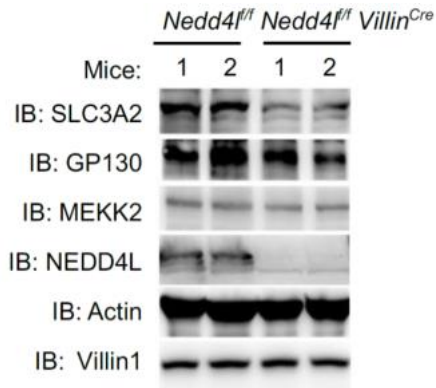

**Full unedited gel for Supplemental Figure 6D**

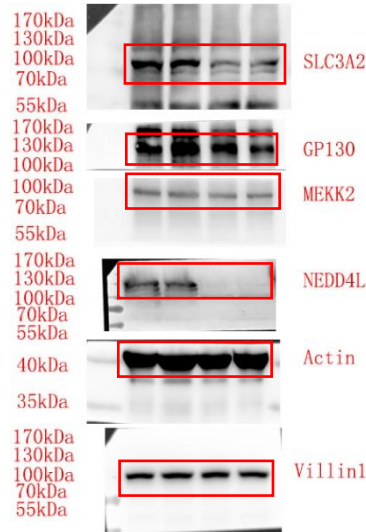

**Supplemental Figure 6G**

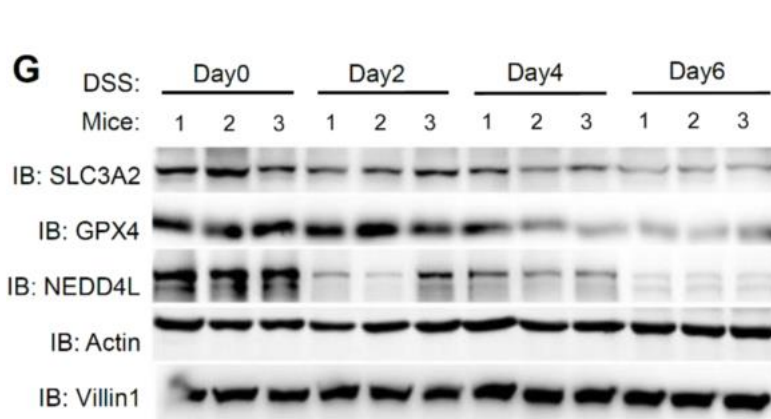

**Full unedited gel for Supplemental Figure 6G**

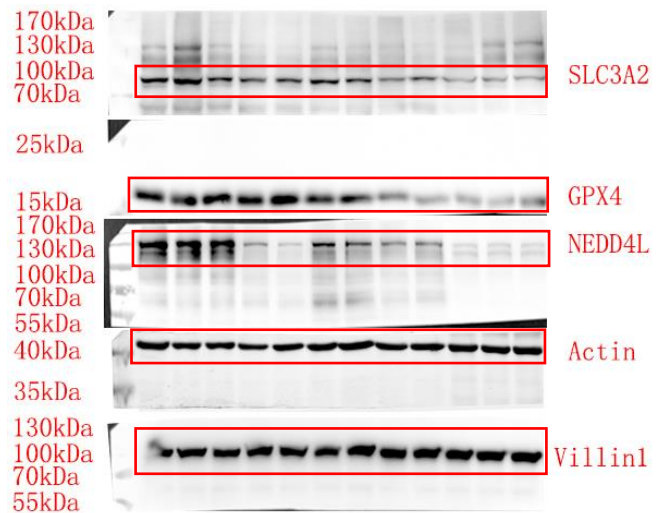

**Supplemental Figure 6J**

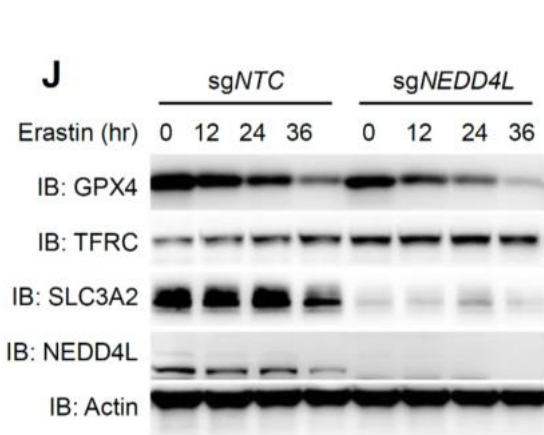

**Full unedited gel for Supplemental Figure 6J**

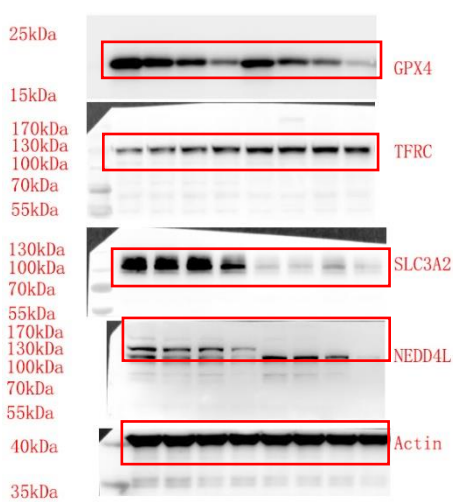

**Supplemental Figure 6K**

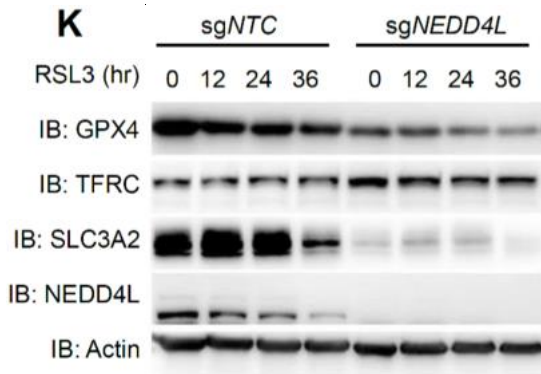

**Full unedited gel for Supplemental Figure 6K**

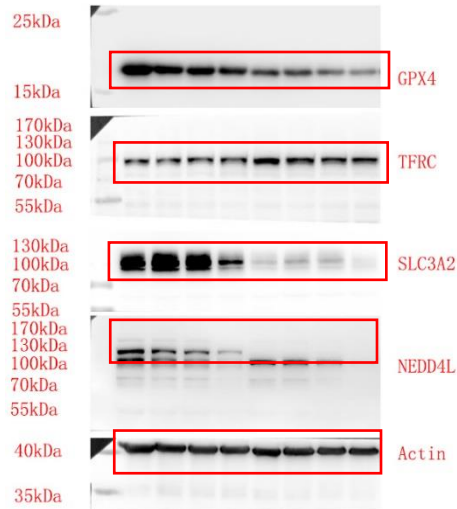

**Supplemental Figure 6L**

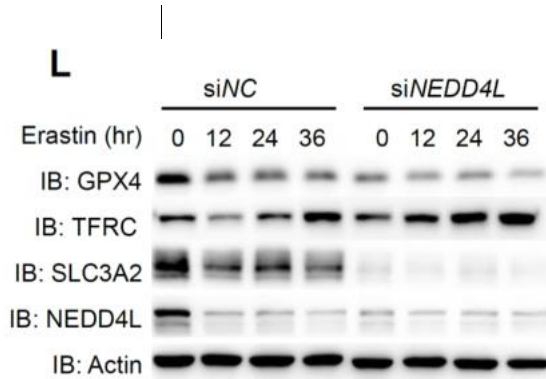

**Full unedited gel for Supplemental Figure 6L**

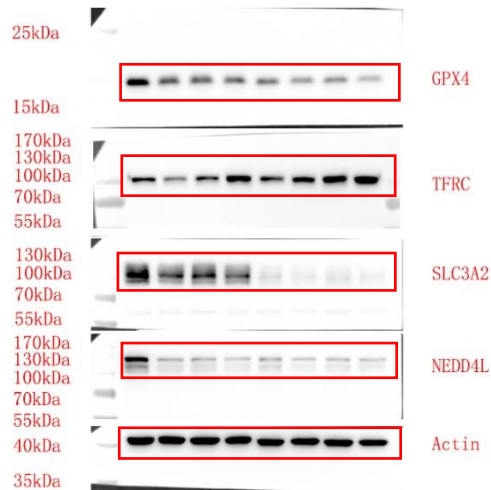

**Supplemental Figure 6M**

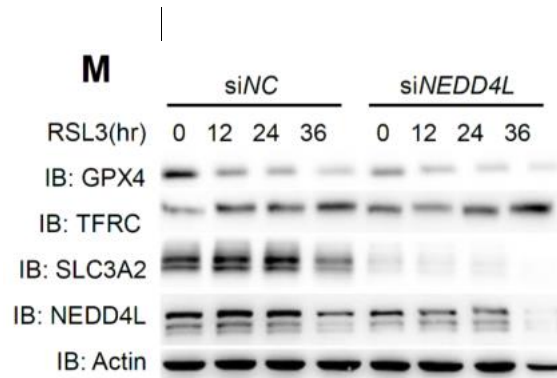

**Full unedited gel for Supplemental Figure 6M**

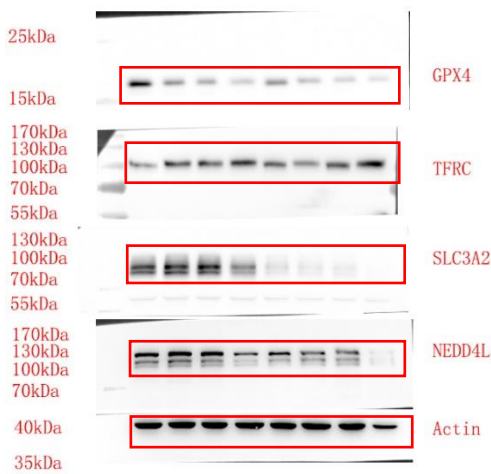



### Supplemental Figure 7G

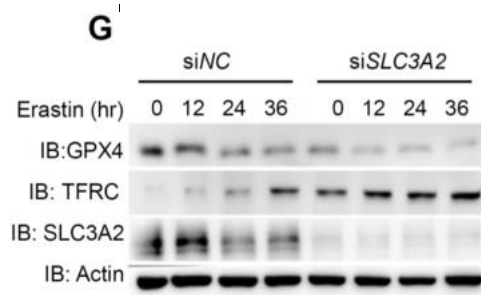

### Full unedited gel for Supplemental Figure 7G

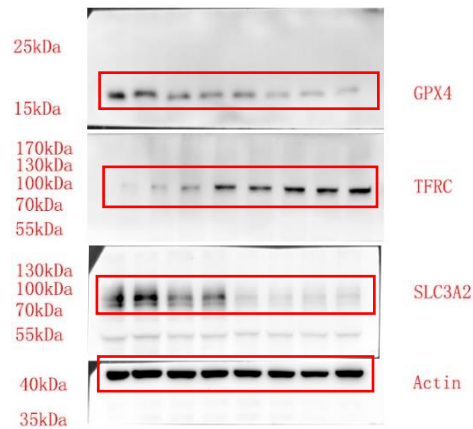

### Supplemental Figure 7H

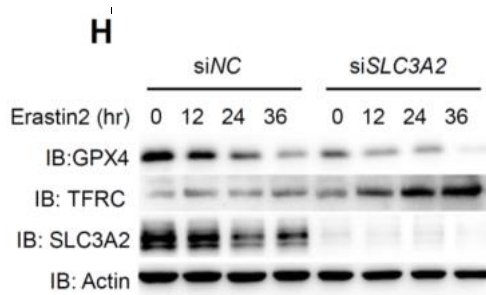

### Full unedited gel for Supplemental Figure 7H

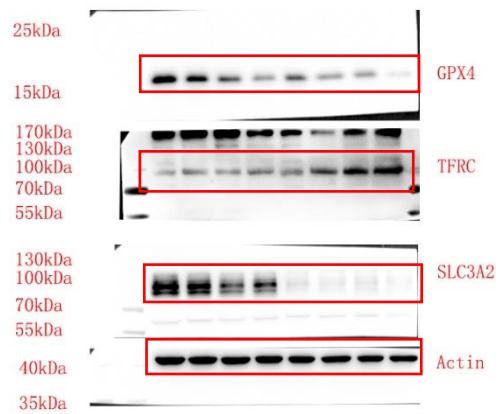

### Supplemental Figure 7I

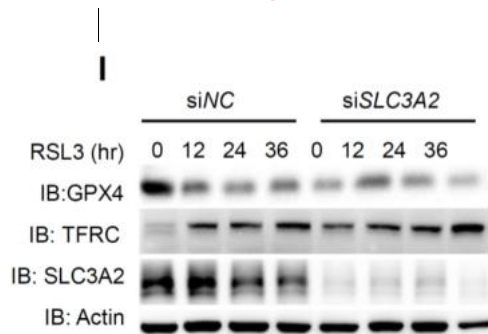

### Full unedited gel for Supplemental Figure 7I

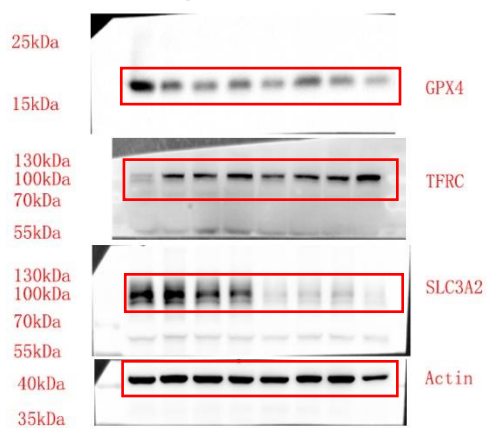

### Supplemental Figure 8A

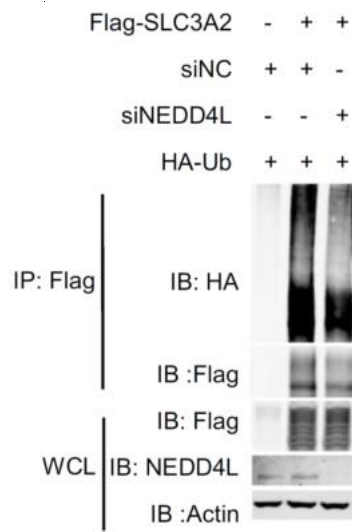

### Full unedited gel for Supplemental Figure 8A

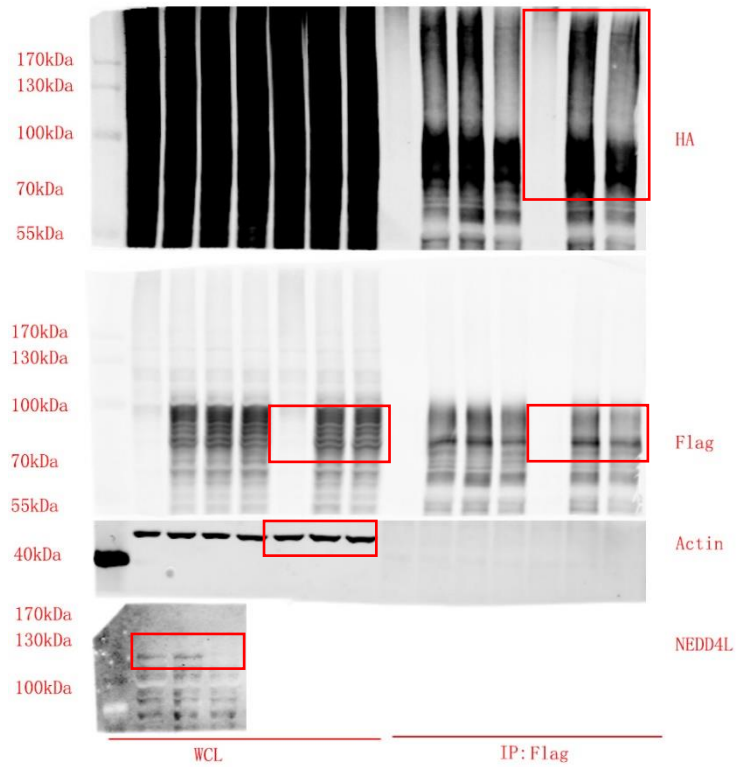

### Supplemental Figure 8B

**B**

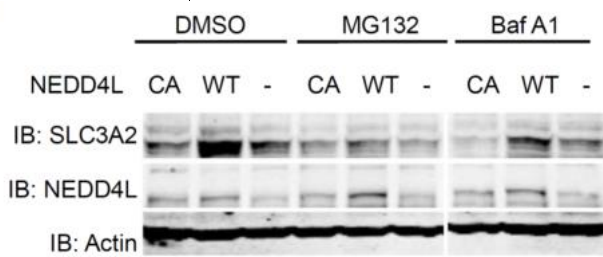

### Full unedited gel for Supplemental Figure 8B

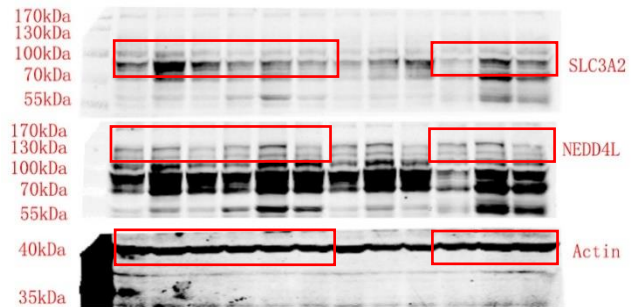

### Supplemental Figure 8C

**C**

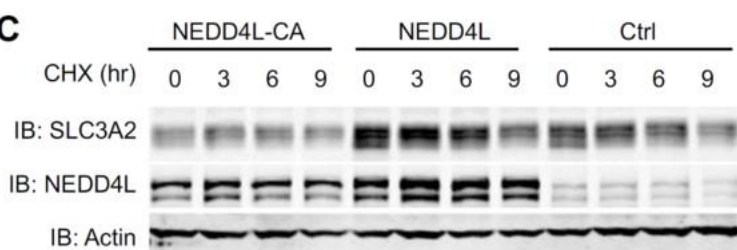

### Full unedited gel for Supplemental Figure 8C

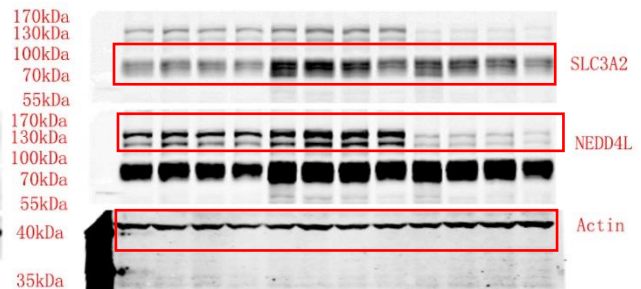

### Supplemental Figure 8D

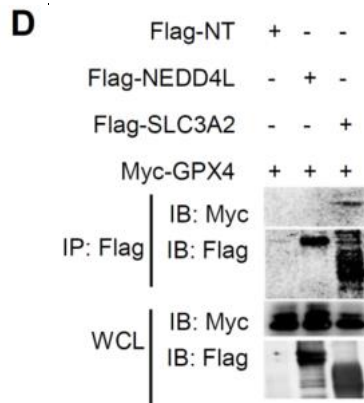

### Full unedited gel for Supplemental Figure 8D

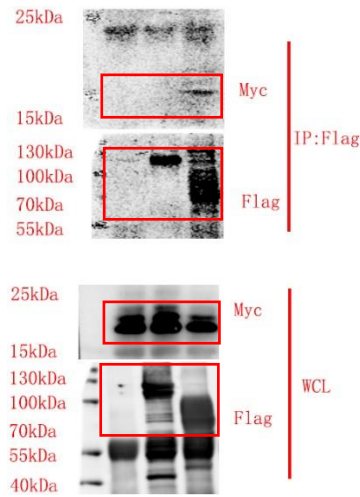

### Supplemental Figure 8E

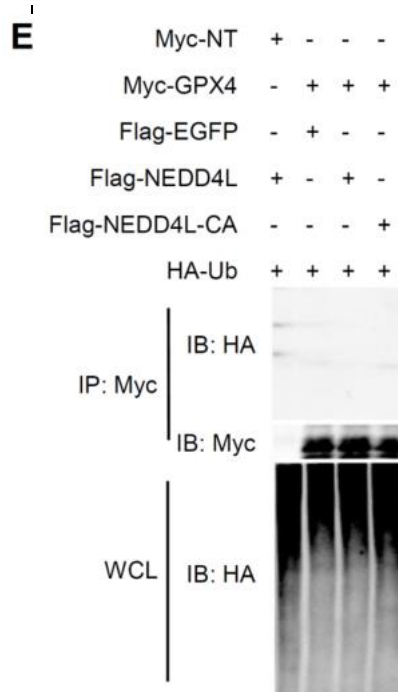

### Full unedited gel for Supplemental Figure 8E

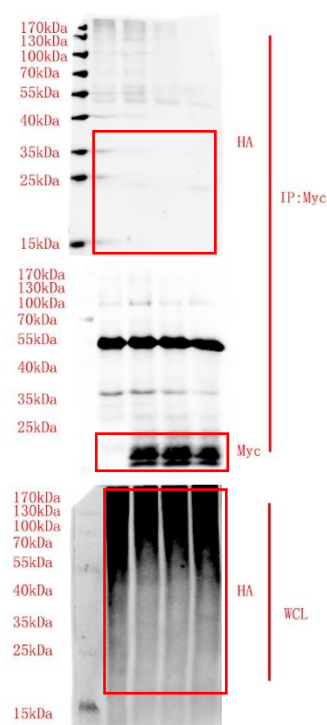

**Supplemental Figure 10J**

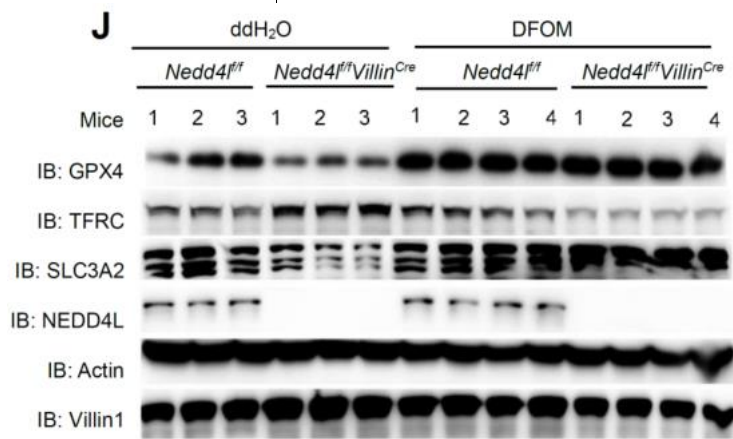

**Full unedited gel for Supplemental Figure 10J**

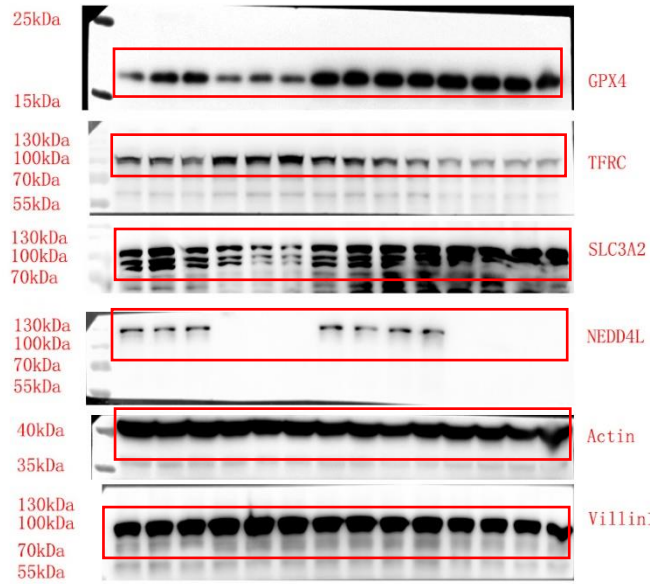

**Supplemental Figure 11M**

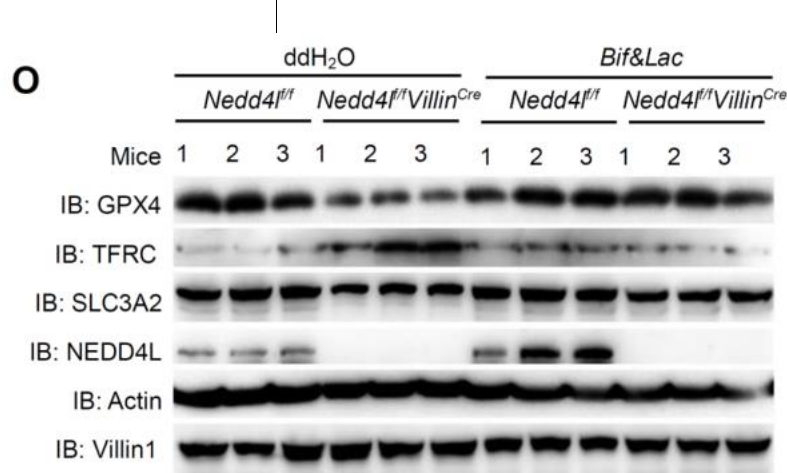

**Full unedited gel for Supplemental Figure 11M**

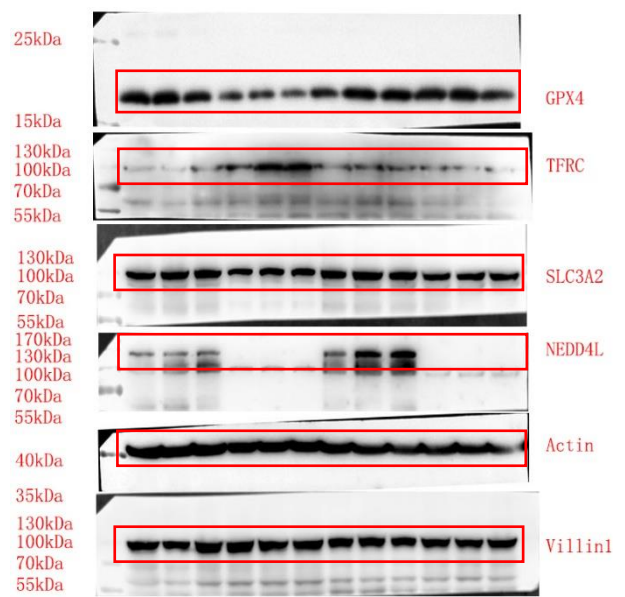

Supplement: sd1 [file 1]
